# Supplementary material
Source: publisher site journal article supplement (https://www.dovepress.com/article/279831)
Supplement: Supplementary file 1 [file get_supplementary_file.php]

**Supplemental Information**

**Human chorionic gonadotropin polypeptide nanoparticle drug delivery system improves methotrexate efficacy in gestational trophoblastic neoplasia in vitro**

Qing Cong, Ling Lin, Biao Qi, Congjian Xu, Xiaoyan Zhang

**
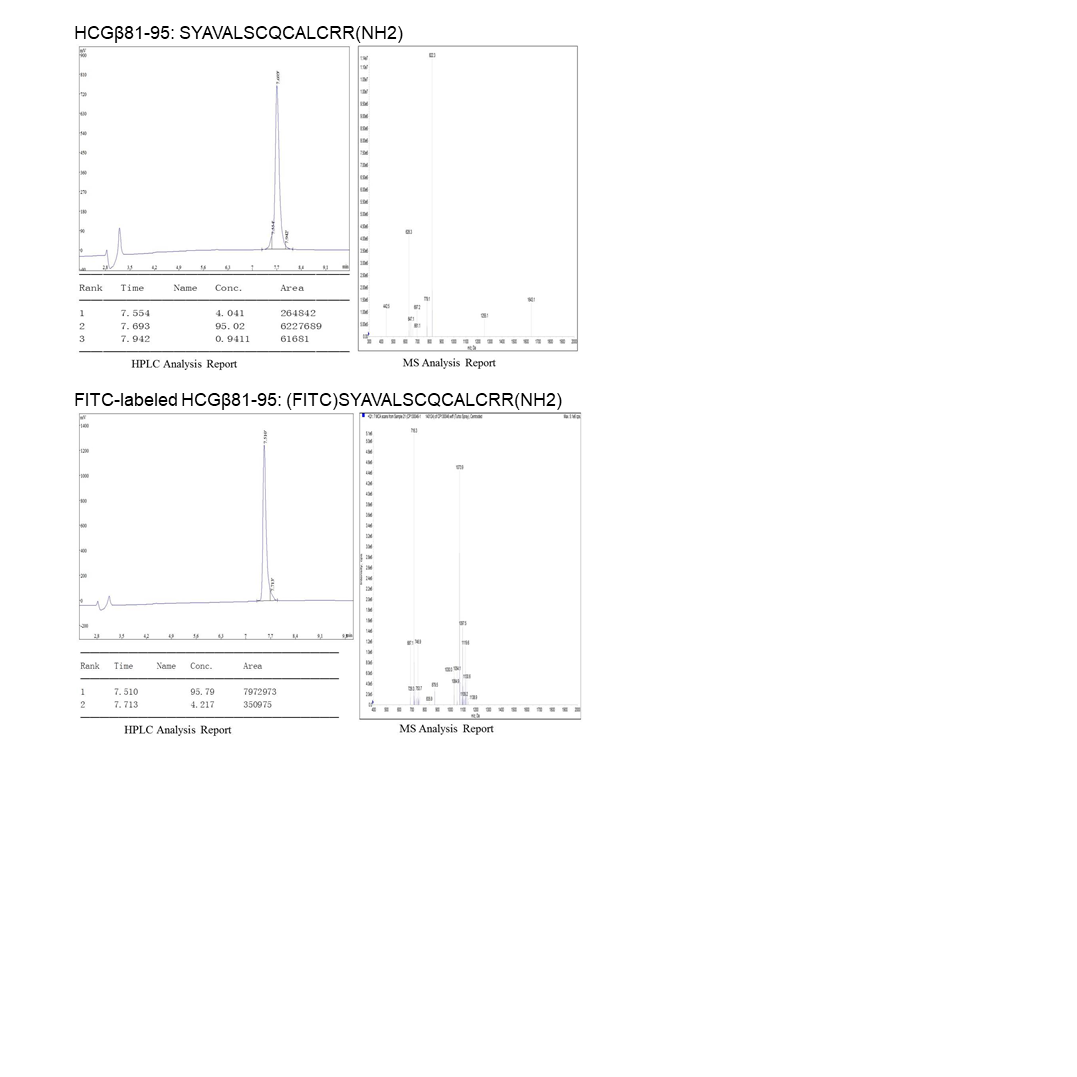
**

**Supplementary Figure 1.** Quality control of HCGβ81-95 and FITC-labeled HCGβ81-95 peptides. HPLC and mass spectrometry analysis of retention time as well as molecular weight for HCGβ81-95 peptide (A) and FITC-labeled HCGβ81-95 peptide (B).

**
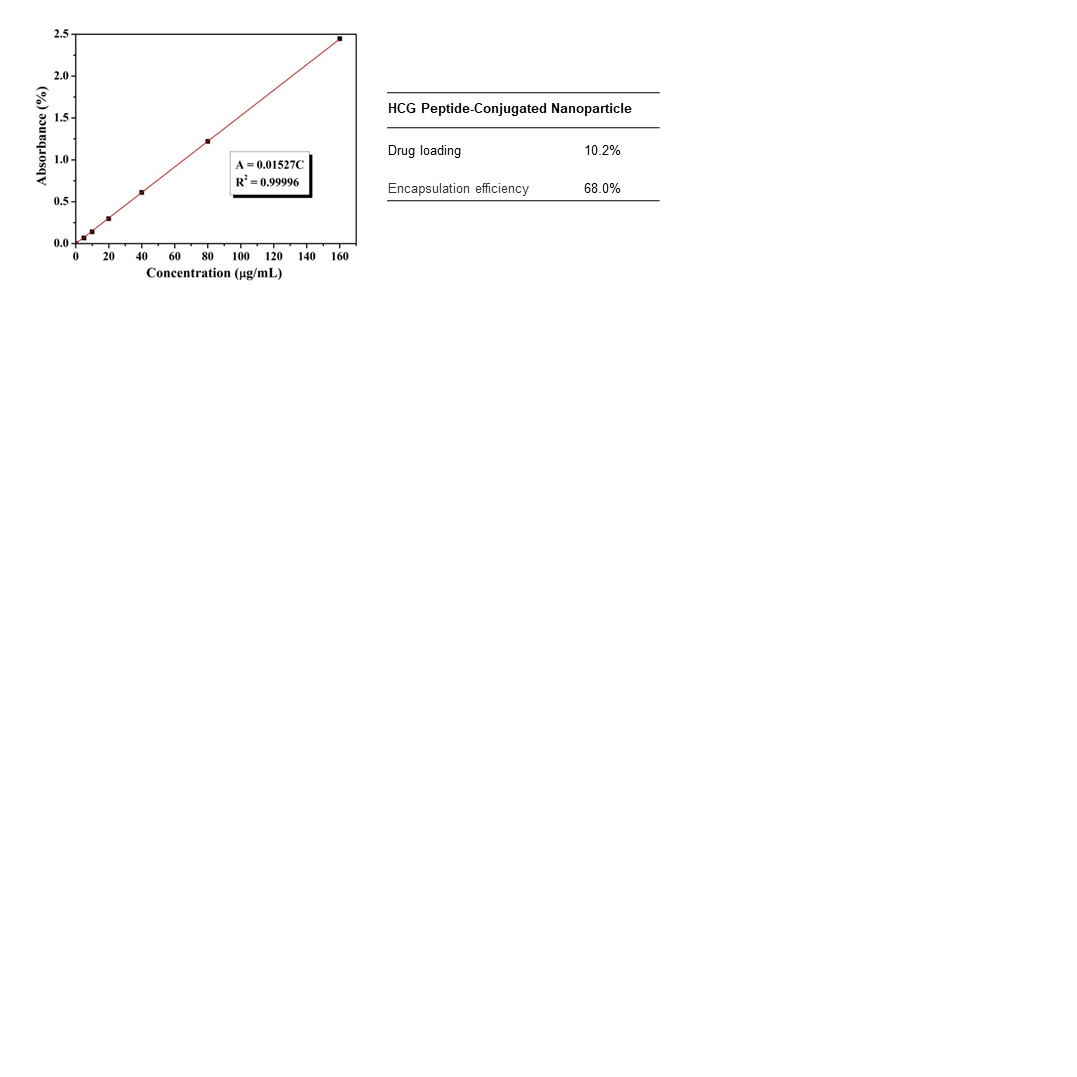
**

**Supplementary Figure 2.** Estimation of encapsulation efficiency using a UV spectrophotometer. Absorbance was converted to amount of drug using a standard graph and the encapsulation efficiency was calculated using the following: Encapsulation Efficiency (%) = Drug Encapsulated / Total Drug X 100.


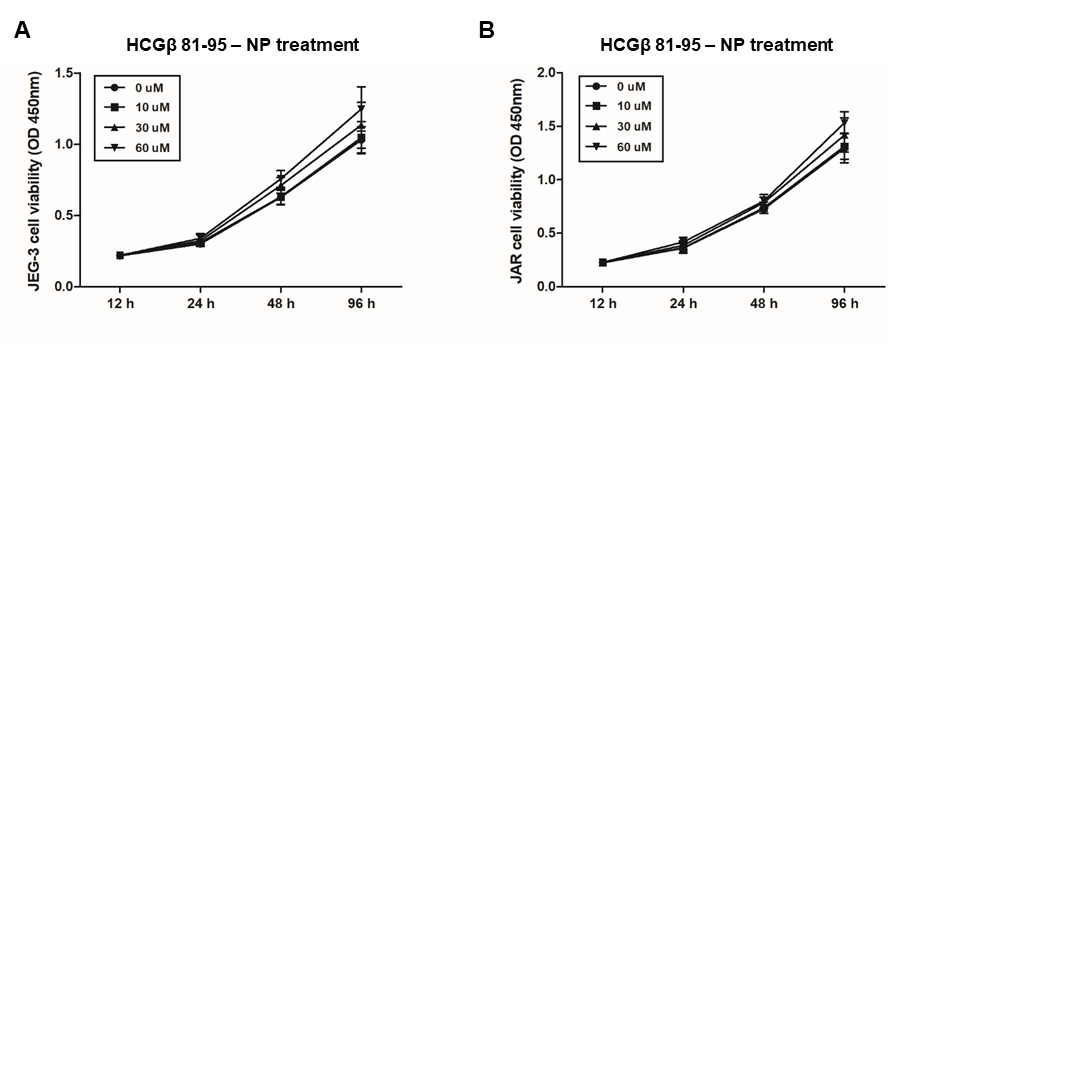


**Supplementary Figure 3.** Proliferation of JEG-3 and JAR cells in response to HCG81-NP treatment. Cell growth were analyzed for HCG81-NP induction to JEG-3 (A) and JAR (B). The experiments were repeated at least 3 times, and error bars represent +/- SD.


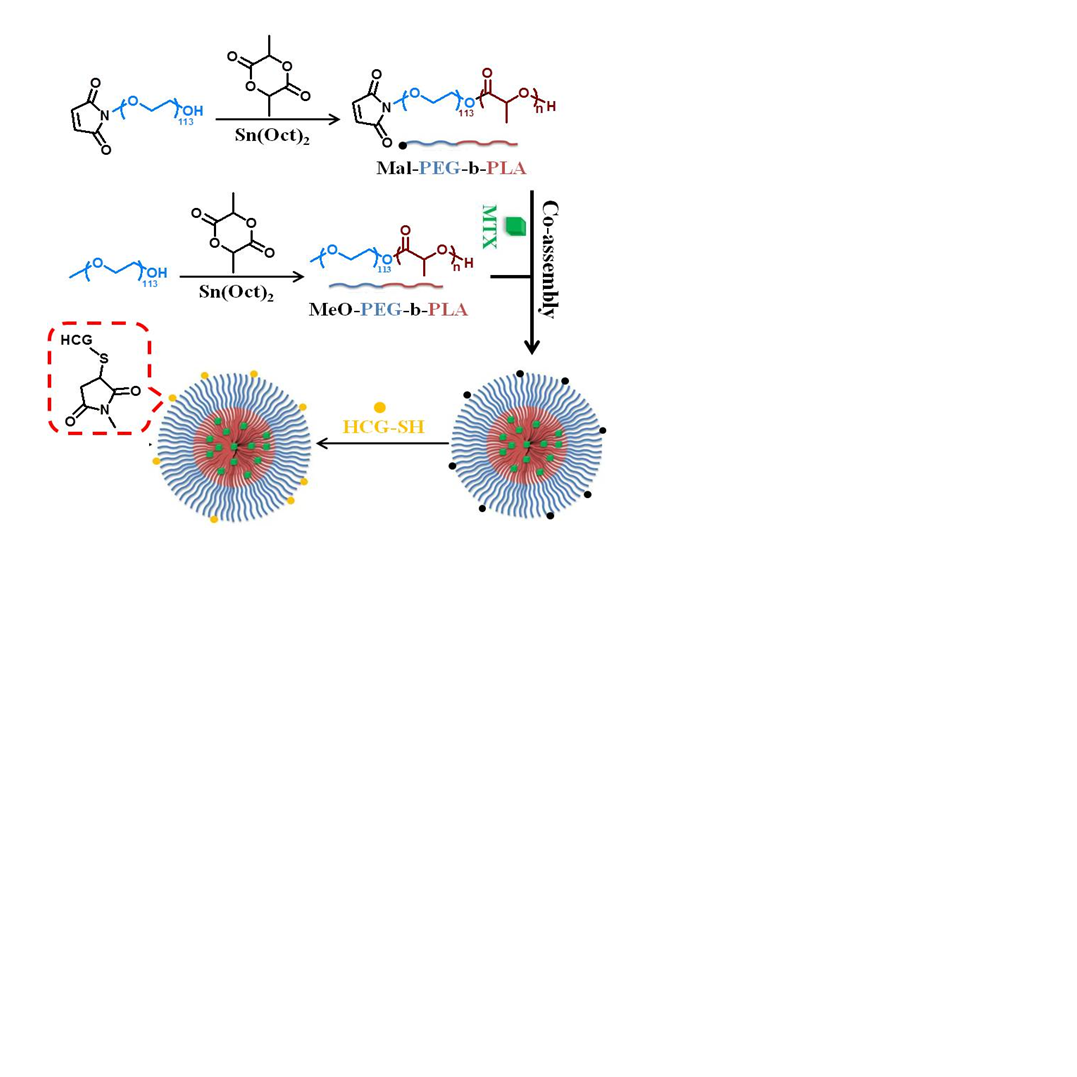


**Supplementary Figure 4.** Working model of HCG81-NP. Using HCG polypeptide fragment as target head base, PEG-PLA copolymers as nanometer materials to load chemotherapy drug MTX.
